# Supplementary material for: Clonal Spread of pESI-Positive Multidrug-Resistant ST32 Salmonella enterica Serovar Infantis Isolates among Broilers and Humans in Slovenia
Source: PubMed Central journal article supplement (PMC9769575; doi:10.1128/spectrum.02481-22), 2022-10-17
Supplement: spectrum.02481-22-s0002.pdf [file spectrum.02481-22-s0002.pdf]

## **Supplementary materials**

### **Clonal spread of pESI-positive multidrug-resistant ST32 *Salmonella* *Infantis* among broilers and humans in Slovenia**

Bojan Papić, Darja Kušar, Jasna Mićunović, Mateja Pirš, Matjaž Ocepek, Jana Avberšek

**This supplementary file includes:**

**Figure S1** cgMLST tree of 161 *Salmonella* Infantis isolates colored according to the food business operation.

**Other supplementary information for this manuscript includes:**

Supplementary Tables S1–S6 (separate sheets in the supplementary Excel file named Tables\_S1-S6.xlsx):

**Table S1** Isolate metadata.

**Table S2** Presence/absence profile of pESI-encoded genes.

**Table S3** Presence/absence profiles of antimicrobial resistance genes and resistance-associated mutations.

**Table S4** Genetic background of antimicrobial resistance.

**Table S5** Pairwise ANIm values and alignment coverage (in parenthesis) for the pESI-like plasmids included in this study.

**Table S6** List of complete pESI-like plasmid sequences used in this study.

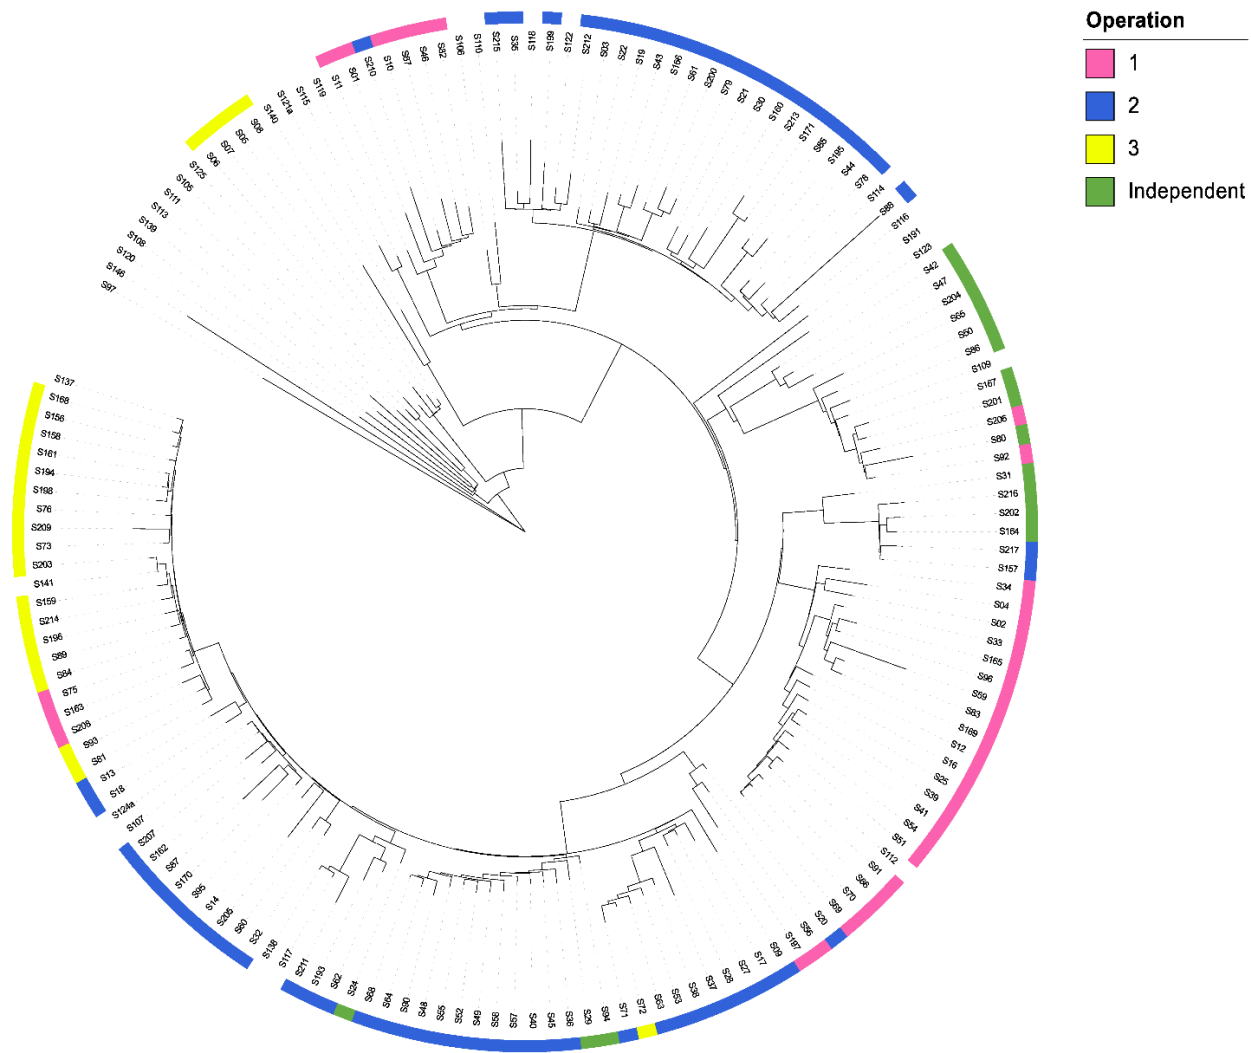

**Figure S1** cgMLST tree of 161 *Salmonella* Infantis isolates colored according to the food business operation. Human isolates are denoted in white.
